# Supplementary material
Source: PubMed Central journal article supplement (PMC9248270)
Supplement: NIHMS1816801-supplement-1.pdf [file NIHMS1816801-supplement-1.pdf]

544 Supplementary material:  
545  
546

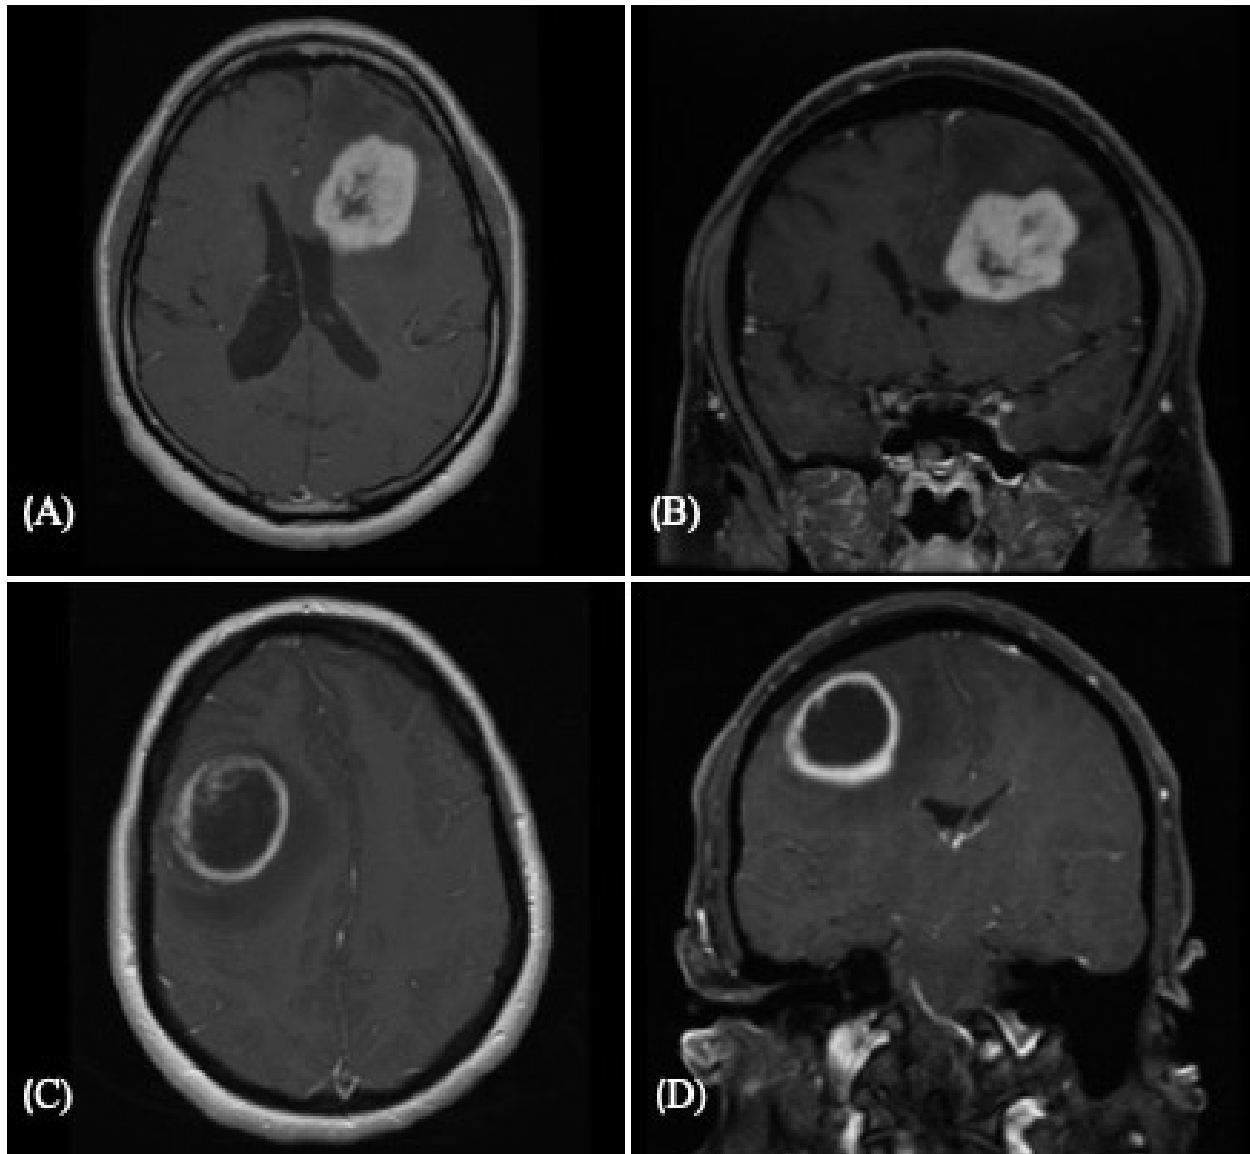

547  
548  
549  
550 **Supplementary Figure 1:** Location of the tumor in relation to the lateral ventricles (LV). **A & B,**  
551 T1-weighted post-contrast MR images, axial and coronal view respectively, showing CE tumor  
552 bordering the LV. **C & D,** T1-weighted post-contrast MR images, axial and coronal view  
553 respectively.

554  
555  
556  
557  
558  
559

560  
561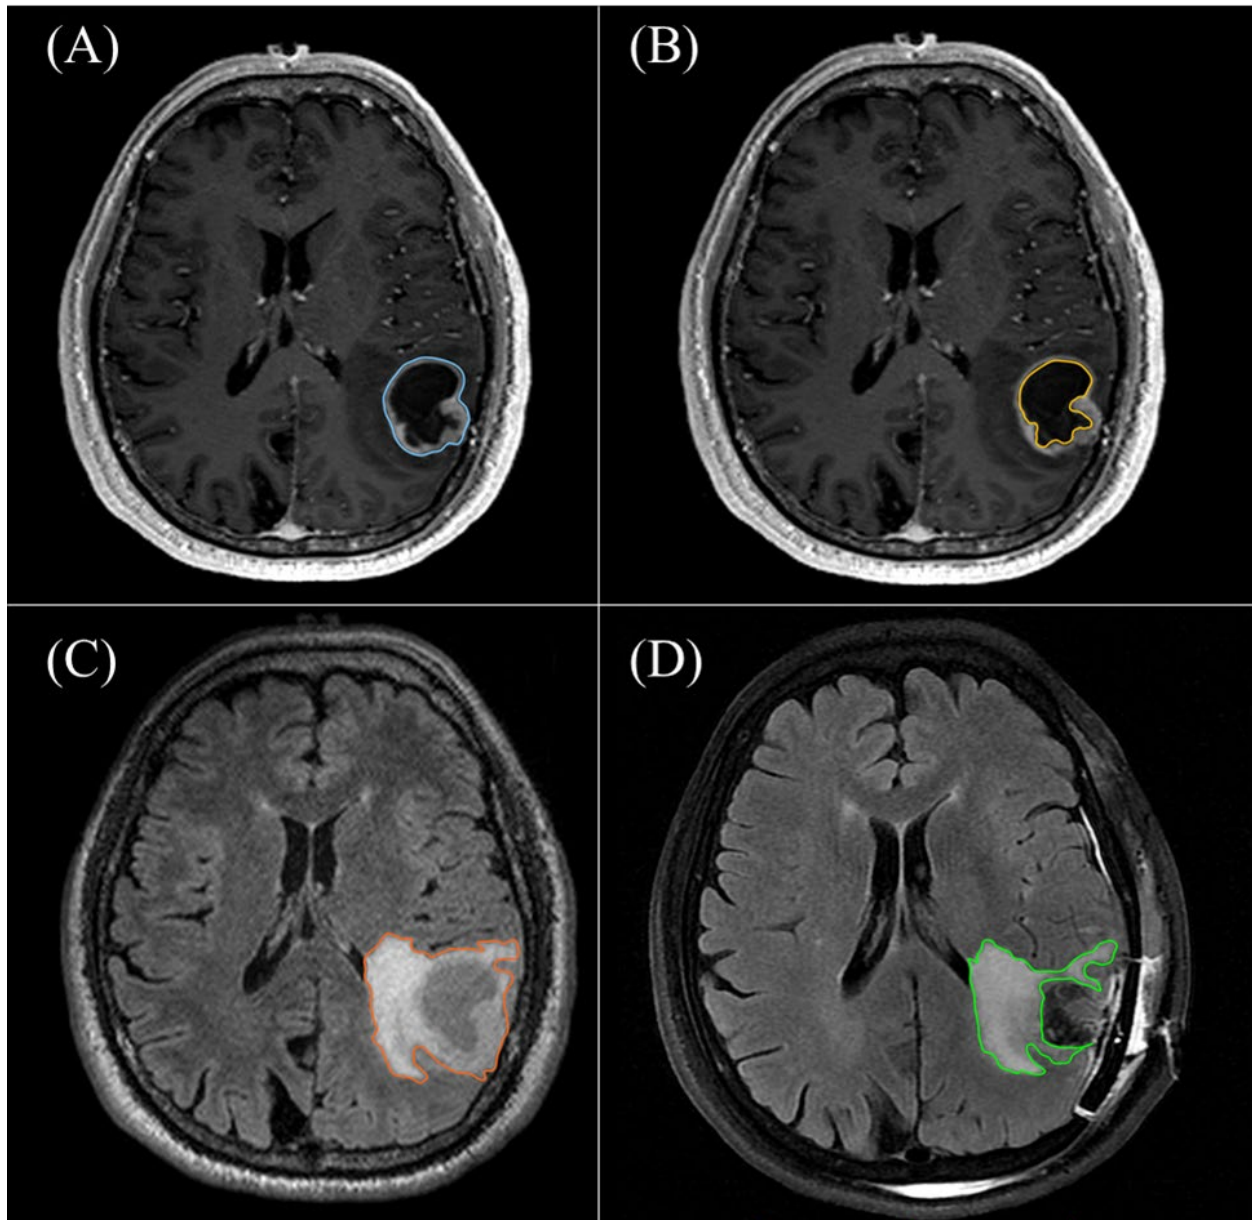562  
563  
564  
565  
566  
567  
568  
569  
570  
571  
572  
573

**Supplementary Figure 2:** Illustration of the Region of interest (ROI) for each volumetric measurement. (A) Contrast-enhancing ROI (blue) on pre-operative MRI axial T1 post-contrast sequence. (B) Cystic/Necrosis ROI (yellow) on pre-operative MRI axial T1 post-contrast sequence. (C) FLAIR ROI (orange) on pre-operative MRI axial FLAIR sequence. (D) FLAIR ROI (green) on post-operative MRI axial FLAIR sequence.

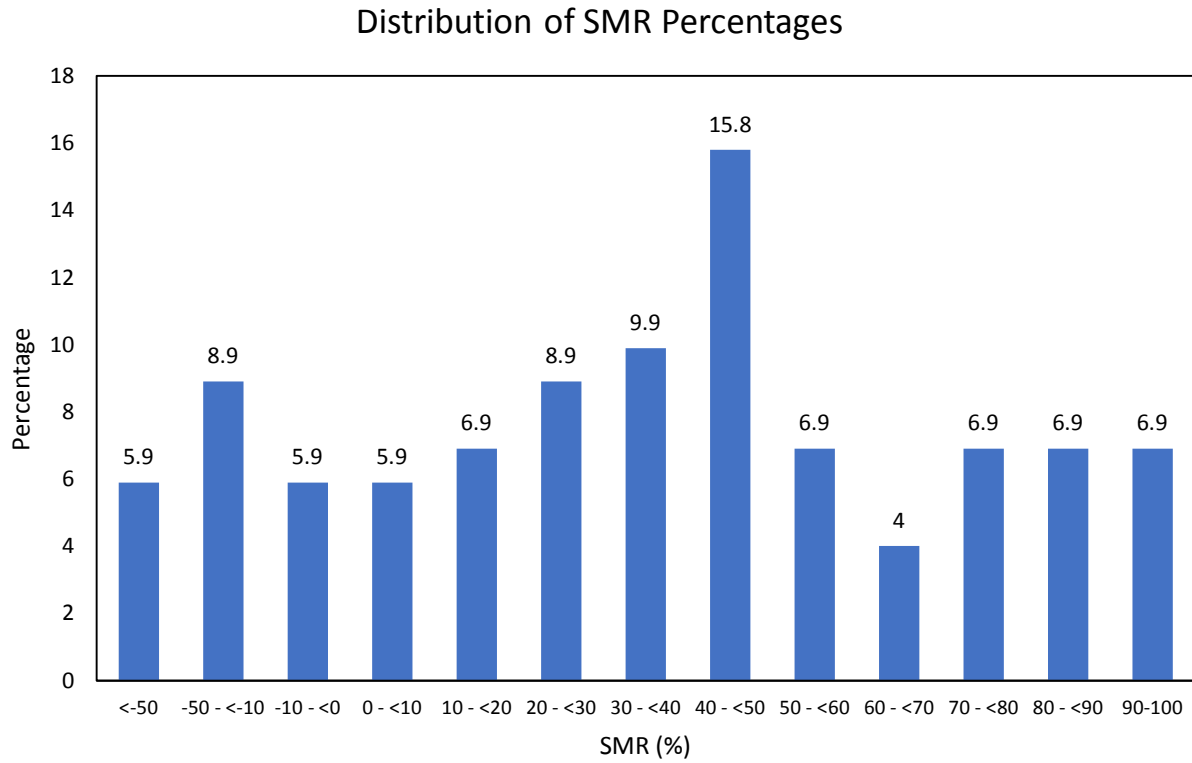

574  
575 **Supplementary Figure 3:** Histogram showing distribution of SMR percentages in our cohort.

576  
577  
578

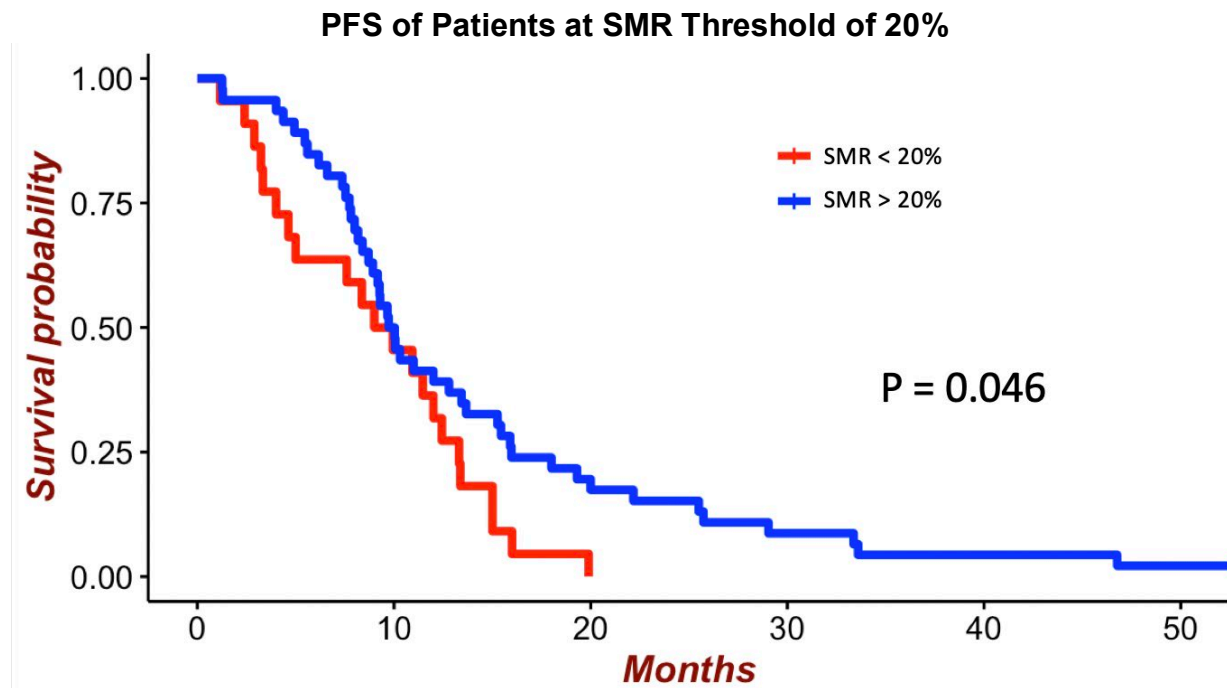

579  
580 **Supplementary Figure 4:** PFS by SMR threshold of 20% among patients with GBM with GTR  
581 of the CE. The mean PFS for patients receiving <20% SMR was 8.7 months compared to 9.6  
582 months for >20% SMR patients (**P = 0.046**).

583

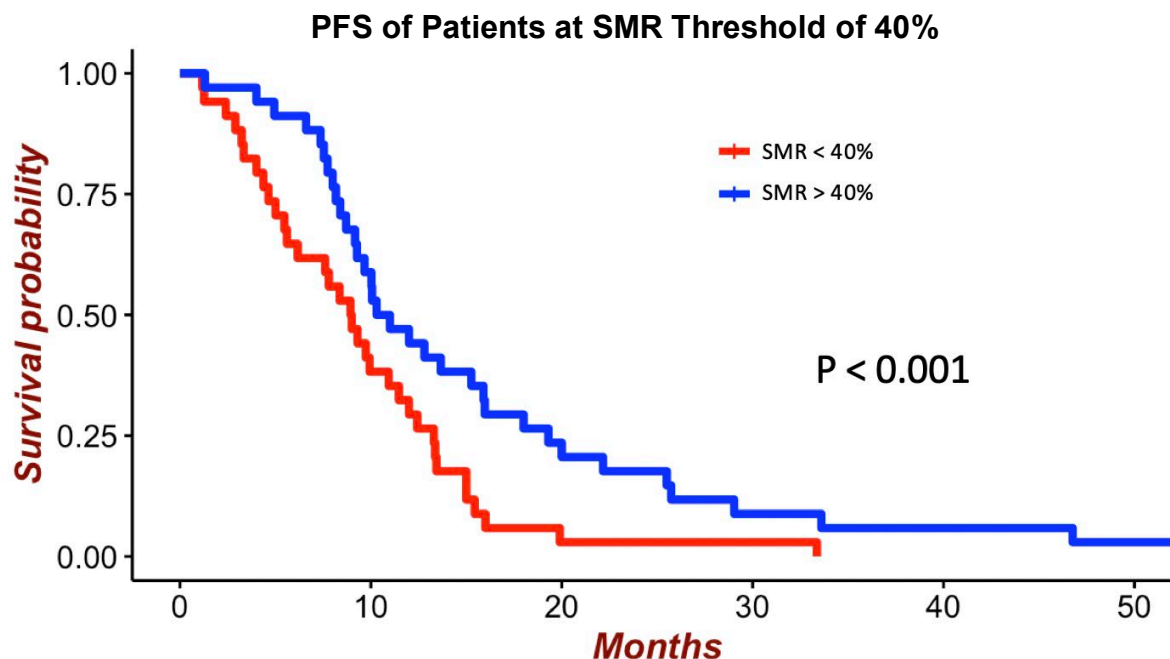

584

585 **Supplementary Figure 5:** PFS by SMR threshold of 40% among patients with GBM with GTR  
 586 of the CE. The mean PFS for patients receiving <40% SMR was 8.9 months compared to 10.6  
 587 months for >40% SMR patients (**P < 0.001**).

588

Supplementary table 1: Univariate Analysis of SMR (%) by Location

| Variable     | Yes   | No    | p Value |
|--------------|-------|-------|---------|
| Deep-seated  | 24.8% | 31.9% | 0.50    |
| Non-Eloquent | 30.0% | 26.4% | 0.73    |

589

Supplementary Table 2: Univariate Analysis of SMR and PFS

| Variable                   | HR (95% CI)        | p Value         |
|----------------------------|--------------------|-----------------|
| % SMR on T2-weighted FLAIR |                    |                 |
| 1% Increments              | 1.00 (0.99 – 1.01) | 0.38            |
| 10% Increments             | 0.92 (0.85 – 0.99) | <b>0.04</b>     |
| > 20%                      | 0.58 (0.34 – 0.99) | <b>0.05</b>     |
| > 30%                      | 0.50 (0.30 – 0.85) | <b>0.01</b>     |
| > 40%                      | 0.52 (0.31 – 0.86) | <b>0.01</b>     |
| > 50%                      | 0.64 (0.38 – 1.06) | 0.08            |
| Age                        |                    |                 |
| ≥ 65 yrs                   | 2.34 (1.31 – 4.19) | <b>&lt;0.01</b> |
| Gender                     |                    |                 |
| Male sex                   | 0.87 (0.52 – 1.45) | 0.59            |
| MGMT                       |                    |                 |
| Promoter methylation       | 0.61 (0.48 - 0.94) | <b>0.04</b>     |
| KPS                        |                    |                 |
| >70                        | 0.48 (0.24 – 0.86) | <b>0.03</b>     |
| Charlson Comorbidity Index | 1.20 (1.01 – 1.43) | <b>0.03</b>     |

590 Boldface type indicates statistical significance ( $p < 0.05$ ).
